# Supplementary material
Source: PubMed Central journal article supplement (PMC5788183)
Supplement: NIHMS928842-supplement-Supplemental.pdf [file NIHMS928842-supplement-Supplemental.pdf]

## Supplemental Figures

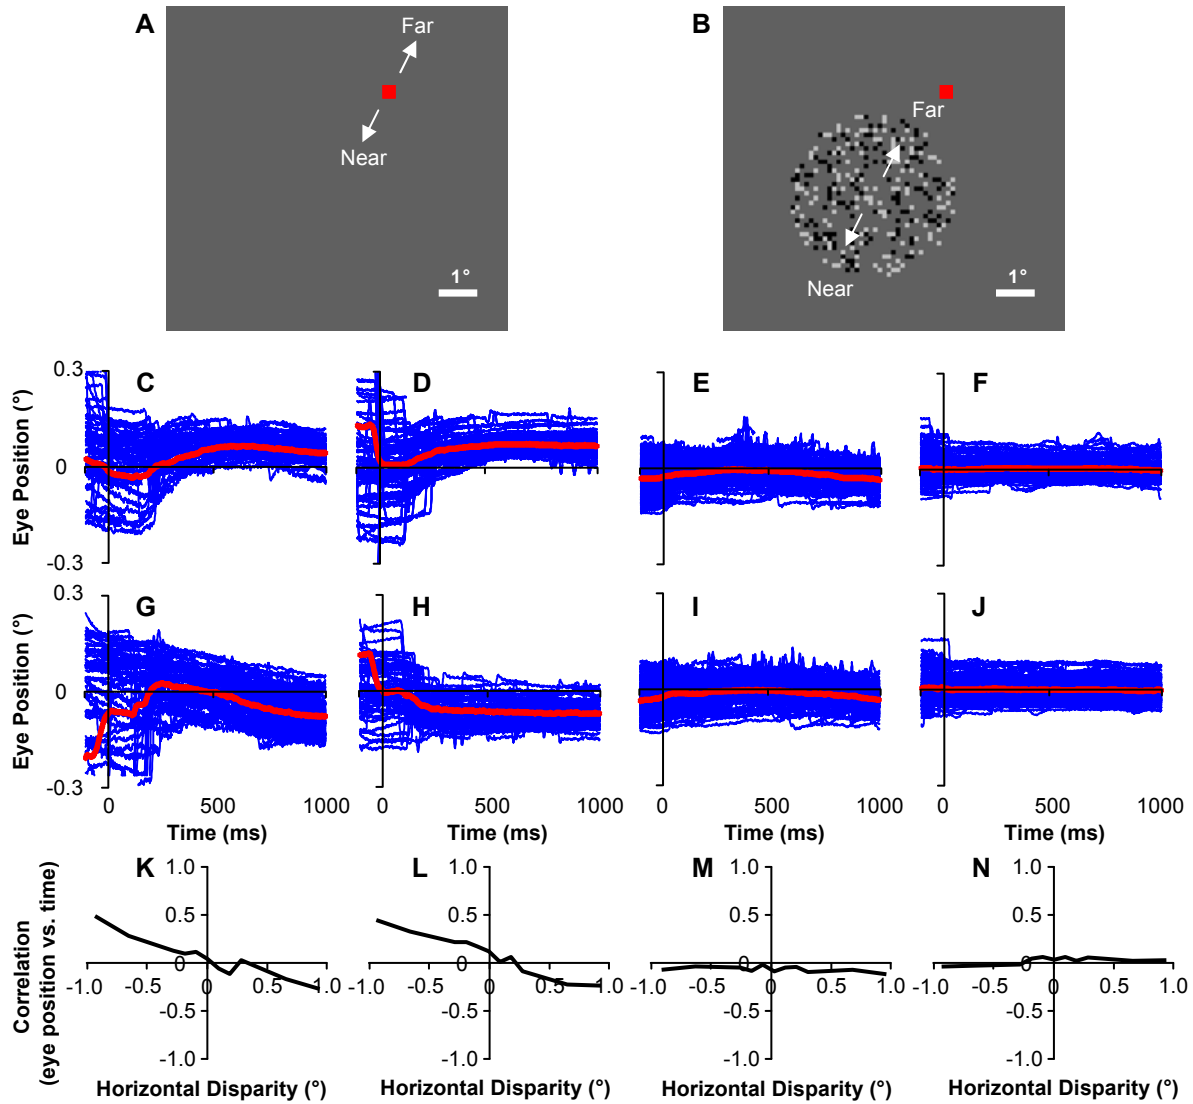

**Figure S1.** Horizontal eye position was monitored while the fixation point (**A**) or stimulus (**B**) was stereoscopically rendered at different depths. **C** and **G**, Individual (blue) and mean (red) horizontal eye positions for one monkey when near (-0.188°) and far (+0.188°) fixation points were presented, respectively. **D** and **H**, same data from the second monkey. **K** and **L**, correlation of horizontal eye positions with time versus fixation point horizontal disparity for each monkey. **E** and **I**, Individual (blue) and mean (red) horizontal eye positions for one monkey when near (-0.188°) and far (+0.188°) DRDS were presented, respectively (fixation point held at 0°). **F** and **J**, same data from the second monkey. **M** and **N**, correlation of horizontal eye positions with time versus DRDS horizontal disparity for each monkey.

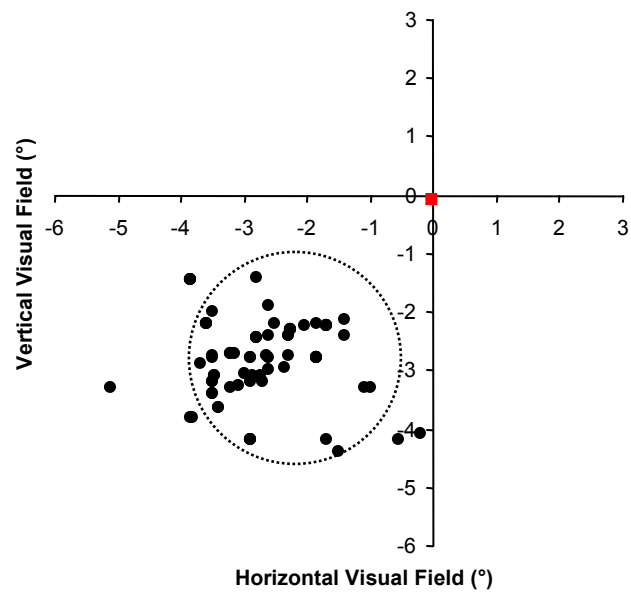

**Figure S2.** Locations of the recorded neurons (black points) relative to fixation (red square). The dashed circle represents the closest location of the DRDS to fixation for all of the recording sessions.

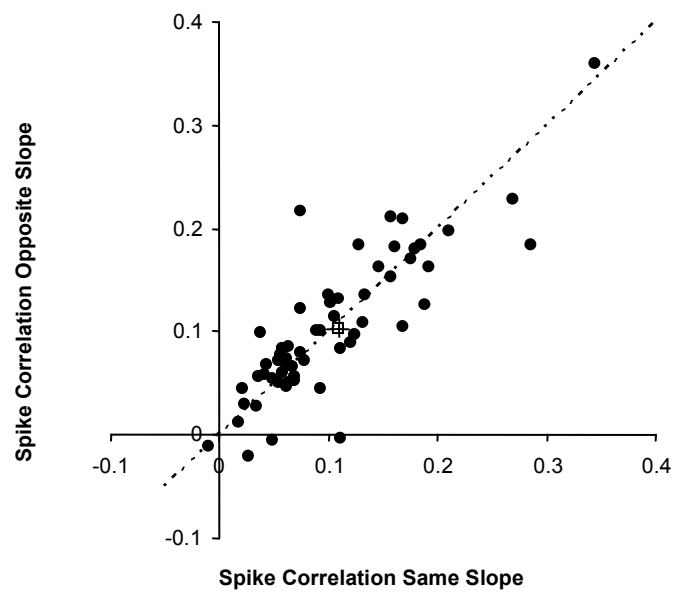

**Figure S3.** Average spike correlation measured when tuning curve slopes had the opposite sign versus when they had the same sign. Open square is the population average with standard error bars ( $n = 63$  pairs).
